# Supplementary material for: Effect of Supplemental Light for Leaves Development and Seed Oil Content in Brassica napus
Source: Preprints.org preprint supplement (doi:10.20944/preprints202408.1878.v1), 2024-08-26
Supplement: Supplementary file 1 [file supplementary]

Table S1 Genes and primers used in qRT-PCR.

| **Gene ID** | **Forword Primers** | **Reverse Primers** | **Description** |
| --- | --- | --- | --- |
| BnaC01g19330D | ACAGGACGGTTGTGGAAGTC | CAGACTGCATTGCCTGCTTG | Lipid transfer protein |
| BnaC03g08840D | CCAATGCCTCCGTCTACAGG | CCTAAATGGACCGGCTTGGT | Lipid transfer protein |
| BnaA01g17200D | AGCCGGCCCATTTAGGATTC | ACTGCATTGCTTGCTTGTGG | Lipid transfer protein |
| BnaA03g06940D | ACAGGACGGTTGTGGAAGTC | GCTTGTGGAGCCATTGTTGG | Lipid transfer protein |
| BnaA05g15470D | TTTCAATGGGAAGTGCCGGA | TCTAGGTGCAGCTTCAACGG | Protein AINTEGUMENTA-LIKE 4 |
| BnaA06g16330D | CTCTCCTGTGCCAACGTTCT | TGGTGACGAGGAGGAAGACA | SWEET sugar transporter |
| BnaC08g20440D | AAGTTACCGGAGGTGACCCT | ACGAACGGCTGTGATTGTCT | Chlorophyll A-B binding protein |
| BnaA03g36810D | CACCATCGGAGATCTGAGCC | CCTTGAAAAGGGGCACAAGC | Chlorophyll A-B binding protein |


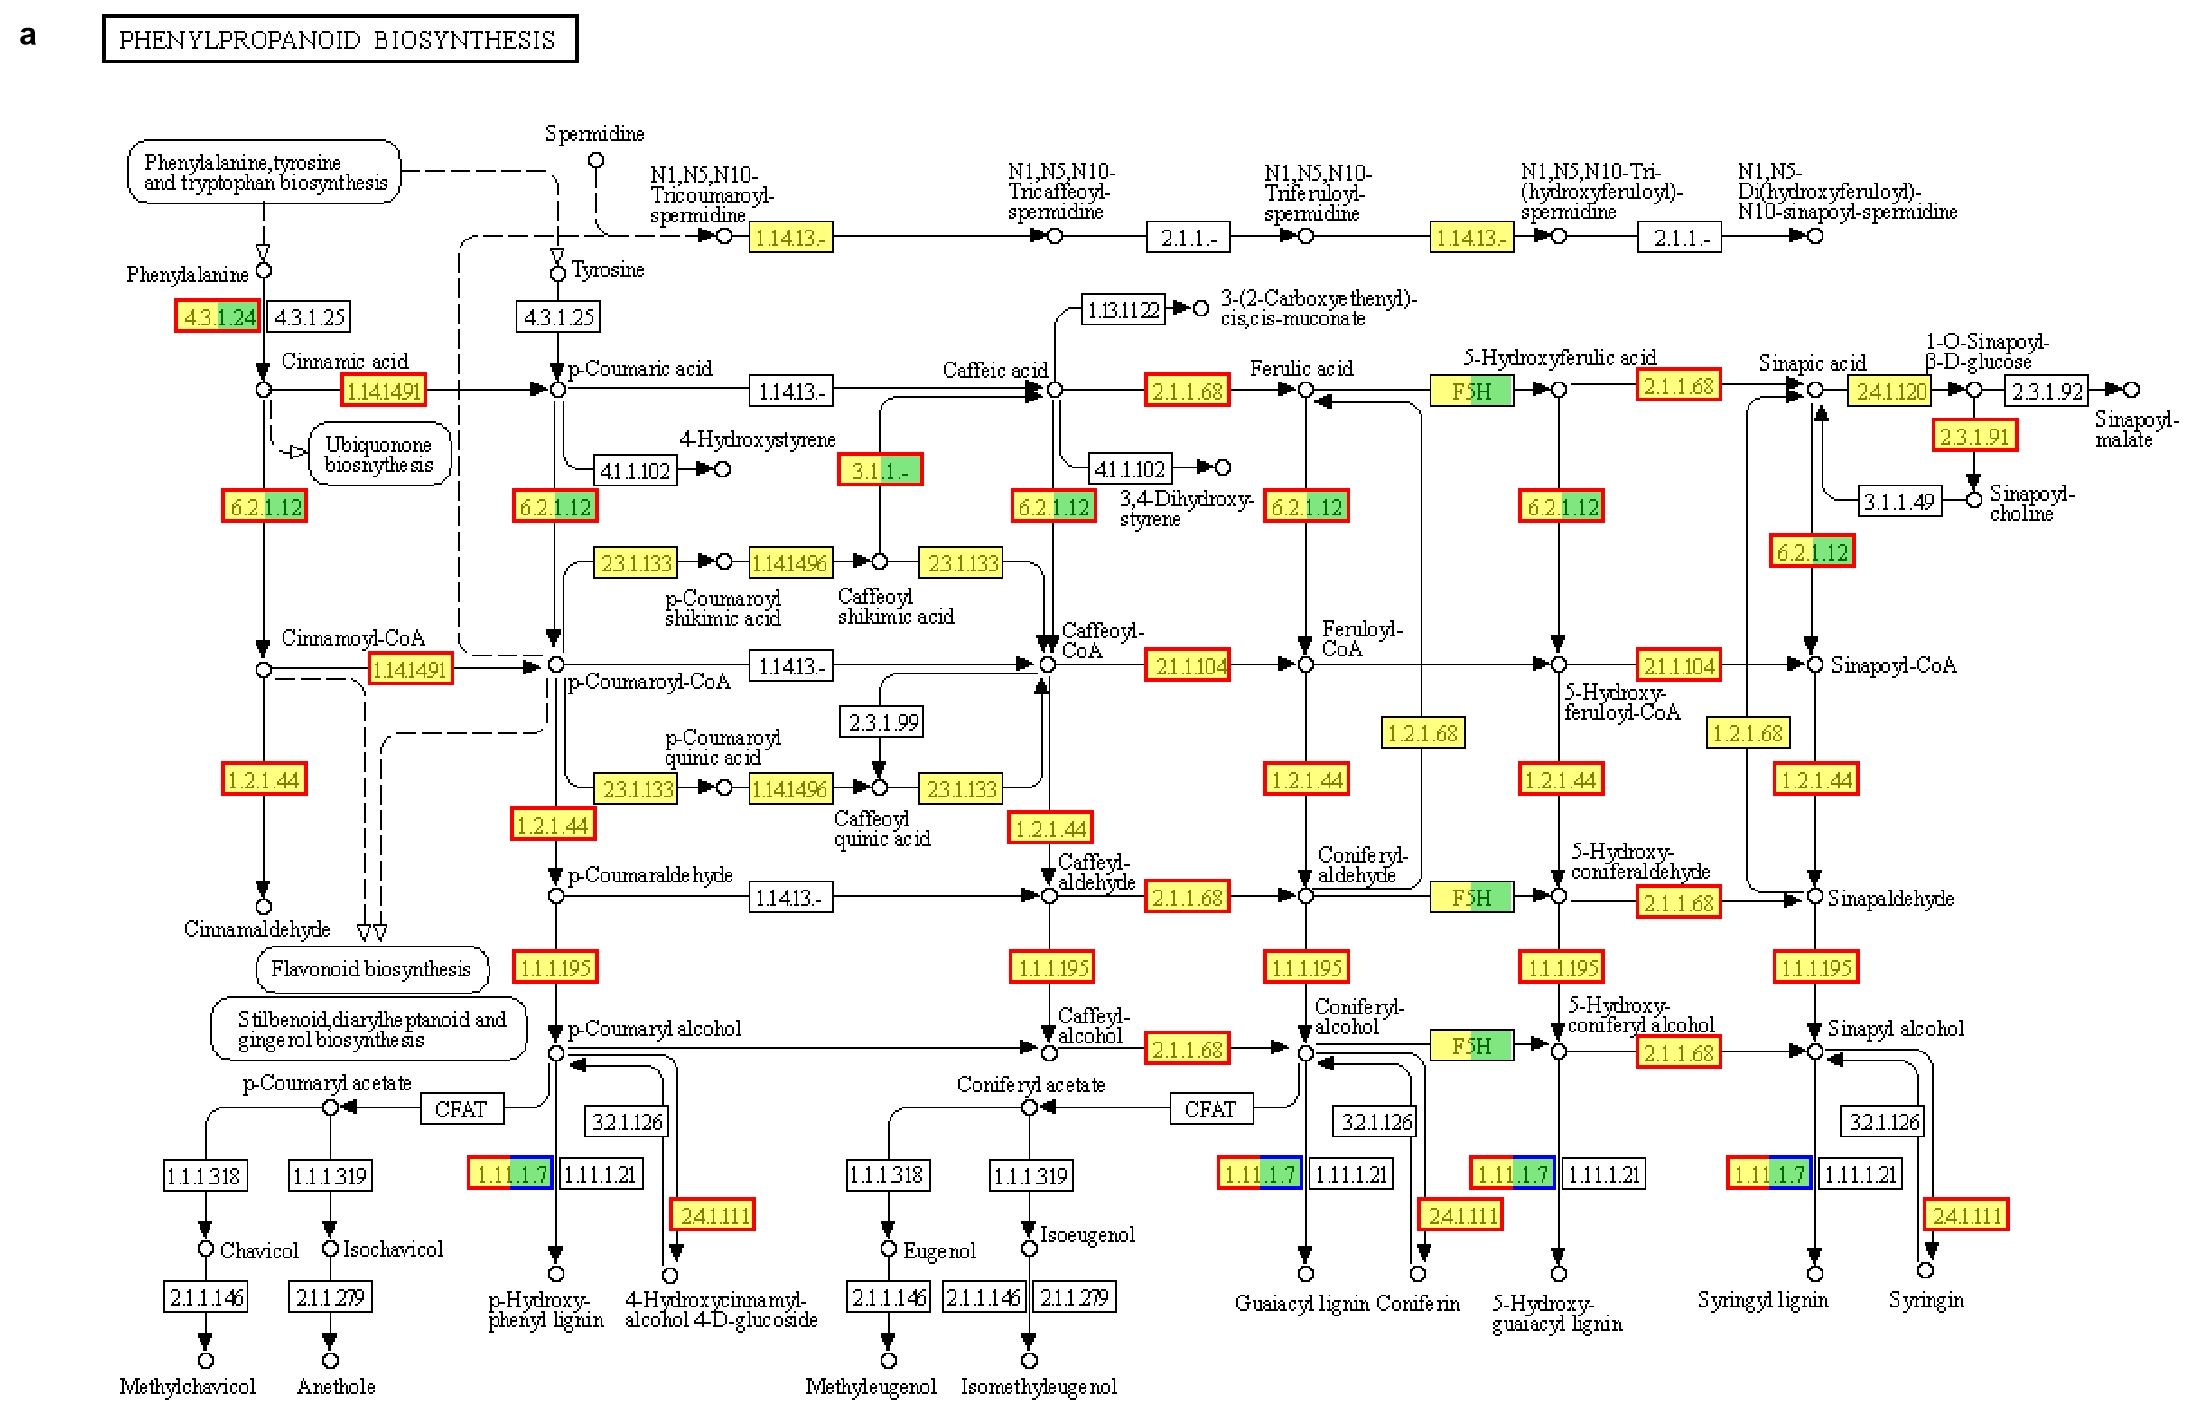


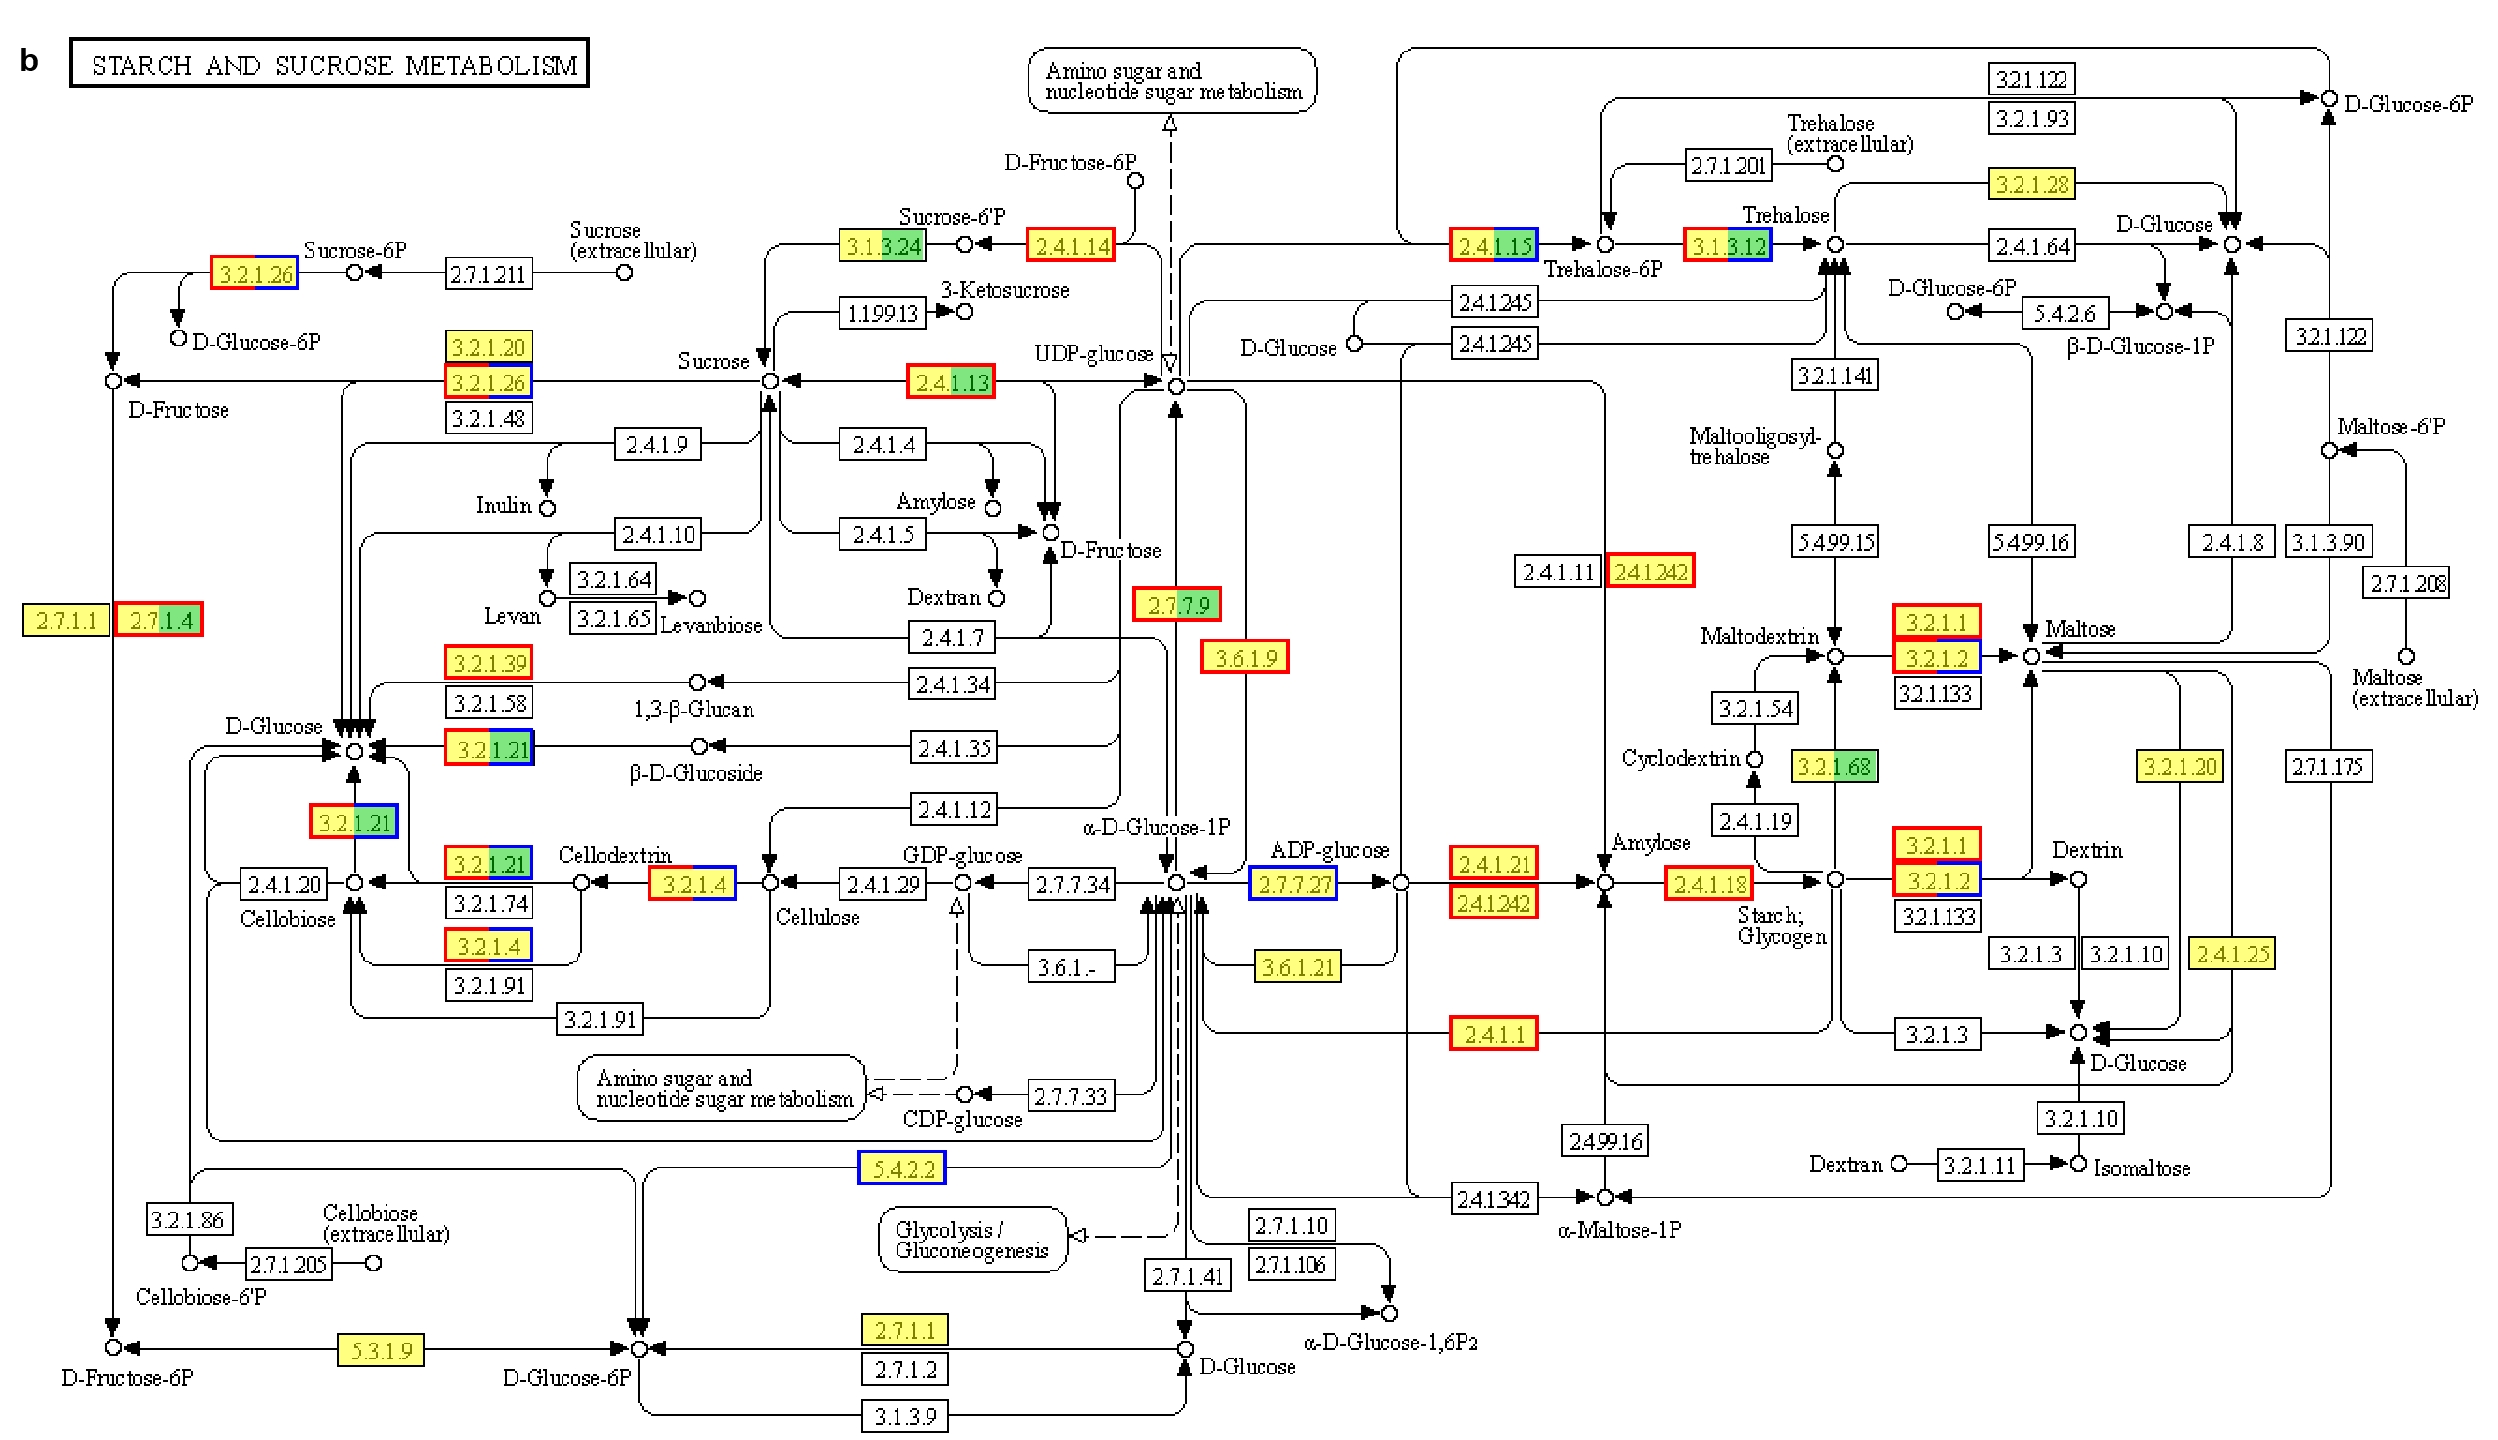


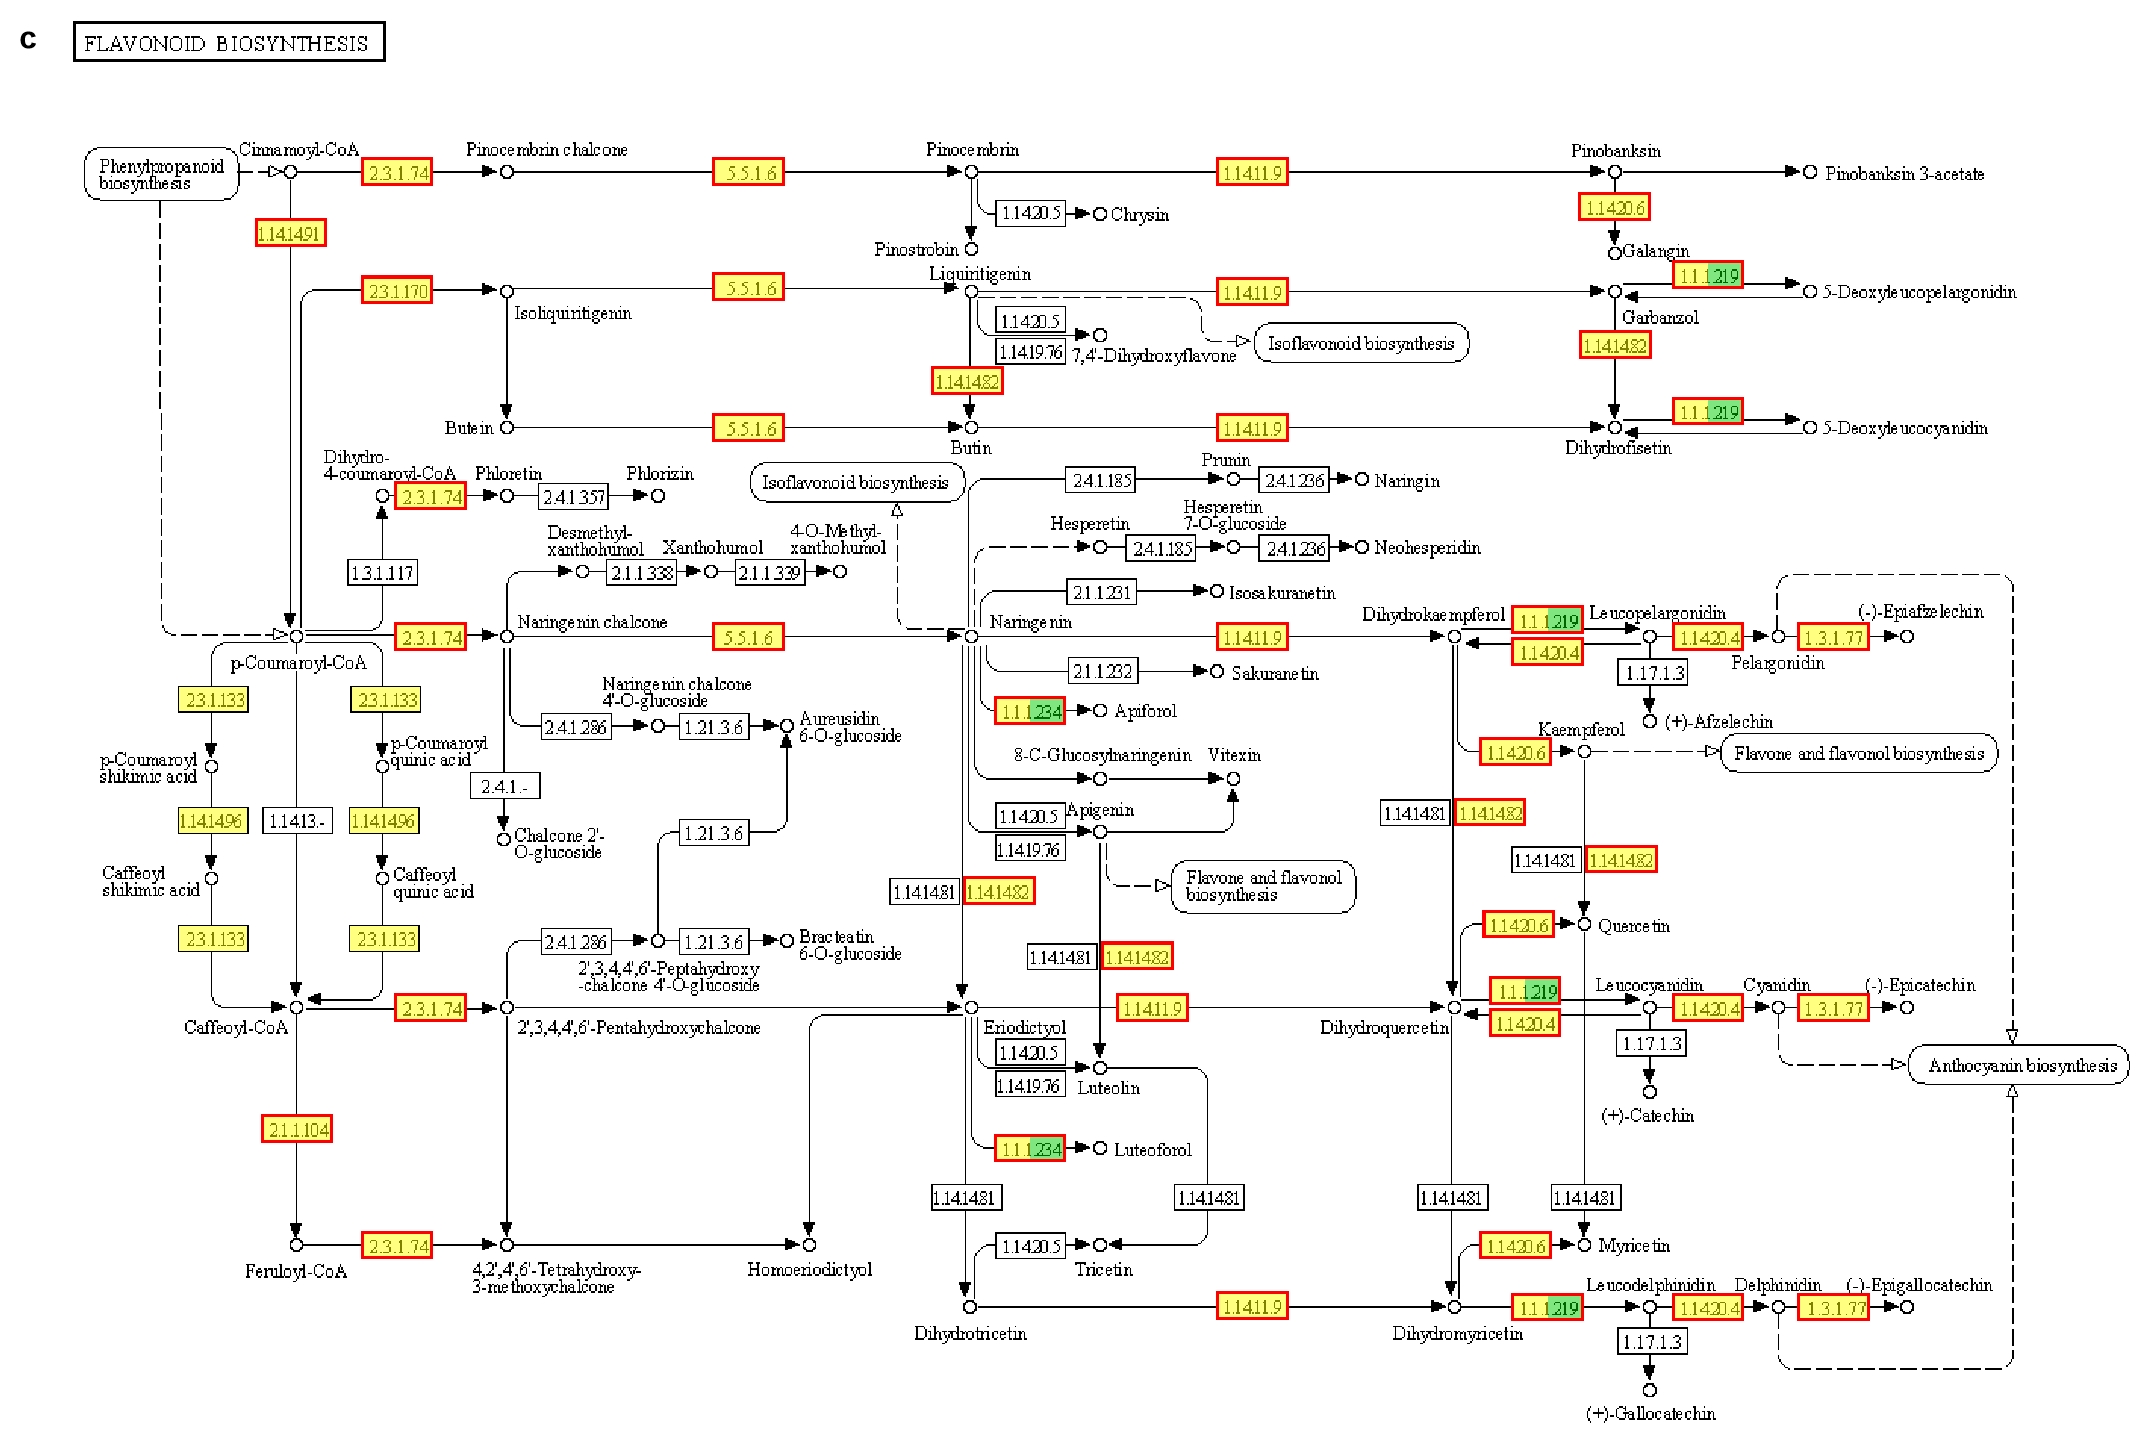


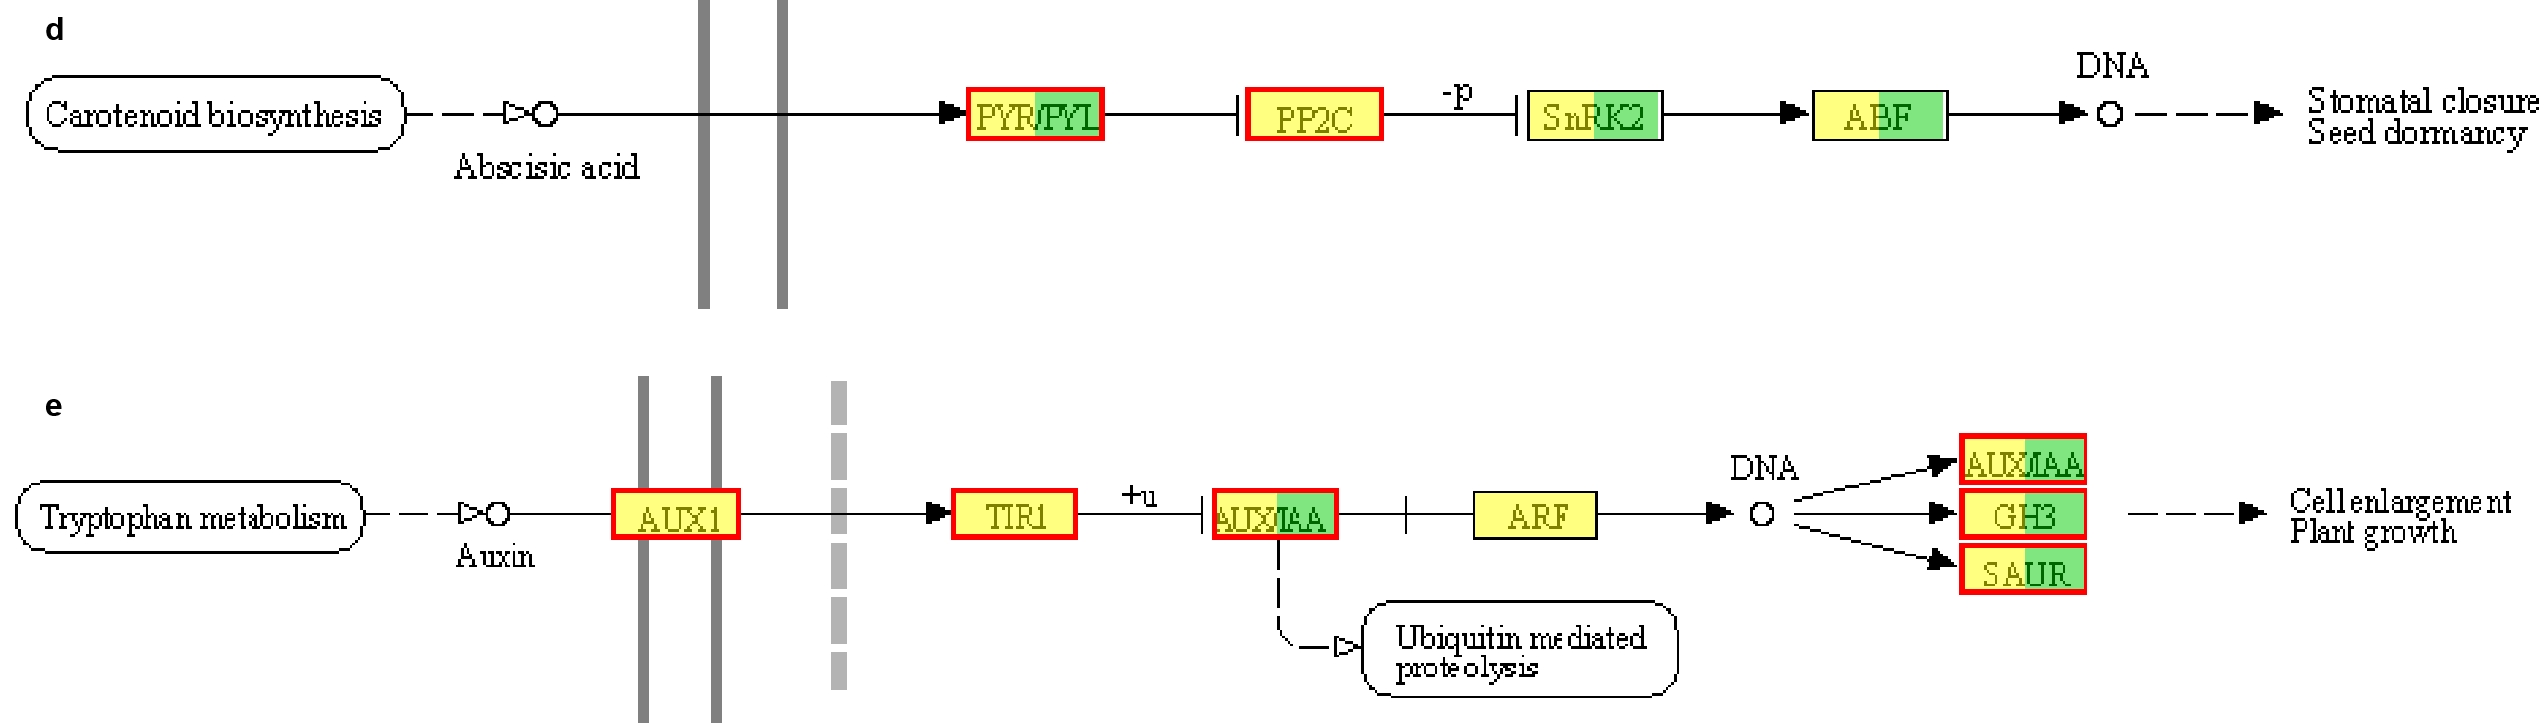


Supplementary Figure 1 Expression profile of pathway. (a) Phenylpropanoid biosynthesis; (b) Stach and sucrose metablism; (c) Flavonoid biosynthesis; (d) Indole-3-acetic acid (IAA) signaling pathway; (e) abscisic acid (ABA) signaling pathway. Solid lines and arrows indicate the signal transduction process and direction. Red frame means up-regulation, Blue frame means down-regulation, Yellow means known genes, Green means new genes.
